# Supplementary material for: Rosmarinic Acid, as an NHE1 Activator, Decreases Skin Surface pH and Improves the Skin Barrier Function
Source: MDPI journal article supplement (doi:10.3390/ijms23073910), 2022-03-31
Supplement: s1 [file s1]

**Table S1. Summary of the calibration curve, linear range, limit of detection (LOD), and limit of quantification (LOQ) for SC lipids**

| Type            | Species                 | Dynamic range (pmol) | Slope  | $r^2$  | Y intercept | LOD <sup>1</sup> (pmol) | LOQ <sup>2</sup> (pmol) |
|-----------------|-------------------------|----------------------|--------|--------|-------------|-------------------------|-------------------------|
| Ceramide NP     | N-16:0 Phytosphingosine | 0.5–500              | 0.0079 | 0.9987 | 0.0125      | 0.1051                  | 0.3186                  |
|                 | N-18:0 Phytosphingosine | 0.5–500              | 0.0071 | 0.9971 | 0.0117      | 0.1634                  | 0.4951                  |
|                 | N-24:0 Phytosphingosine | 0.5–500              | 0.0057 | 0.9989 | 0.0103      | 0.1458                  | 0.4419                  |
| Free fatty acid | C16                     | 0.5–500              | 0.0062 | 0.9968 | 0.0222      | 0.2097                  | 0.6348                  |
|                 | C18                     | 0.5–500              | 0.0055 | 0.9955 | 0.0150      | 0.2113                  | 0.6401                  |
|                 | C24                     | 0.5–500              | 0.0054 | 0.9979 | 0.0226      | 0.2341                  | 0.7098                  |
| Cholesterol     | Cholesterol             | 2–500                | 0.0021 | 0.9962 | 0.0049      | 0.5598                  | 1.6975                  |

<sup>1</sup>LOD =  $3.3 \times \sigma / S$

<sup>2</sup>LOQ =  $10 \times \sigma / S$

( $\sigma$  = Standard deviation of the response, S = The slope of the calibration curve.)

**Table S2. Accuracy and precision of SC lipid analysis**

| Type                    | Spike amount (pmol) | Precision (RSD <sup>1</sup> , %) | Accuracy (Accuracy <sup>2</sup> , %) |
|-------------------------|---------------------|----------------------------------|--------------------------------------|
| N-16:0 Phytosphingosine | 0.7                 | 11.22                            | 88.06 ± 11.88                        |
|                         | 5                   | 5.08                             | 101.20 ± 3.66                        |
|                         | 400                 | 1.37                             | 97.34 ± 1.02                         |
| N-18:0 Phytosphingosine | 0.7                 | 14.91                            | 89.04 ± 13.49                        |
|                         | 5                   | 6.81                             | 100.64 ± 3.73                        |
|                         | 400                 | 2.39                             | 103.73 ± 1.19                        |
| N-24:0 Phytosphingosine | 0.7                 | 15.26                            | 87.12 ± 14.59                        |
|                         | 5                   | 7.40                             | 103.11 ± 4.08                        |
|                         | 400                 | 2.08                             | 99.78 ± 1.11                         |
| C16:0 Free fatty acid   | 0.7                 | 14.67                            | 89.75 ± 8.57                         |
|                         | 5                   | 5.44                             | 104.11 ± 4.28                        |
|                         | 400                 | 2.61                             | 100.57 ± 1.58                        |
| C18:0 Free fatty acid   | 0.7                 | 13.03                            | 87.37 ± 9.11                         |
|                         | 5                   | 3.30                             | 94.42 ± 2.39                         |
|                         | 400                 | 1.87                             | 100.91 ± 1.74                        |
| C24:0 Free fatty acid   | 0.7                 | 10.88                            | 89.10 ± 9.54                         |
|                         | 5                   | 3.28                             | 94.40 ± 3.95                         |
|                         | 400                 | 2.52                             | 102.09 ± 2.17                        |
| Cholesterol             | 3                   | 8.95                             | 89.79 ± 7.47                         |
|                         | 10                  | 2.33                             | 99.96 ± 2.01                         |
|                         | 400                 | 1.12                             | 100.55 ± 1.03                        |

<sup>1</sup>RSD (%) = (standard deviation of the concentration/mean concentration) × 100

<sup>2</sup>Accuracy (%) = (calculated concentration/theoretical concentration) × 100
